# Supplementary material for: Use of a MAIT-Activating Ligand, 5-OP-RU, as a Mucosal Adjuvant in a Murine Model of Vibrio cholerae O1 Vaccination
Source: PubMed Central journal article supplement (PMC9438945; doi:10.20411/pai.v7i1.525), 2022-08-24
Supplement: pai-7-122-s01.pdf [file pai-7-122-s01.pdf]

**SUPPLEMENTARY FIGURES AND TABLE**

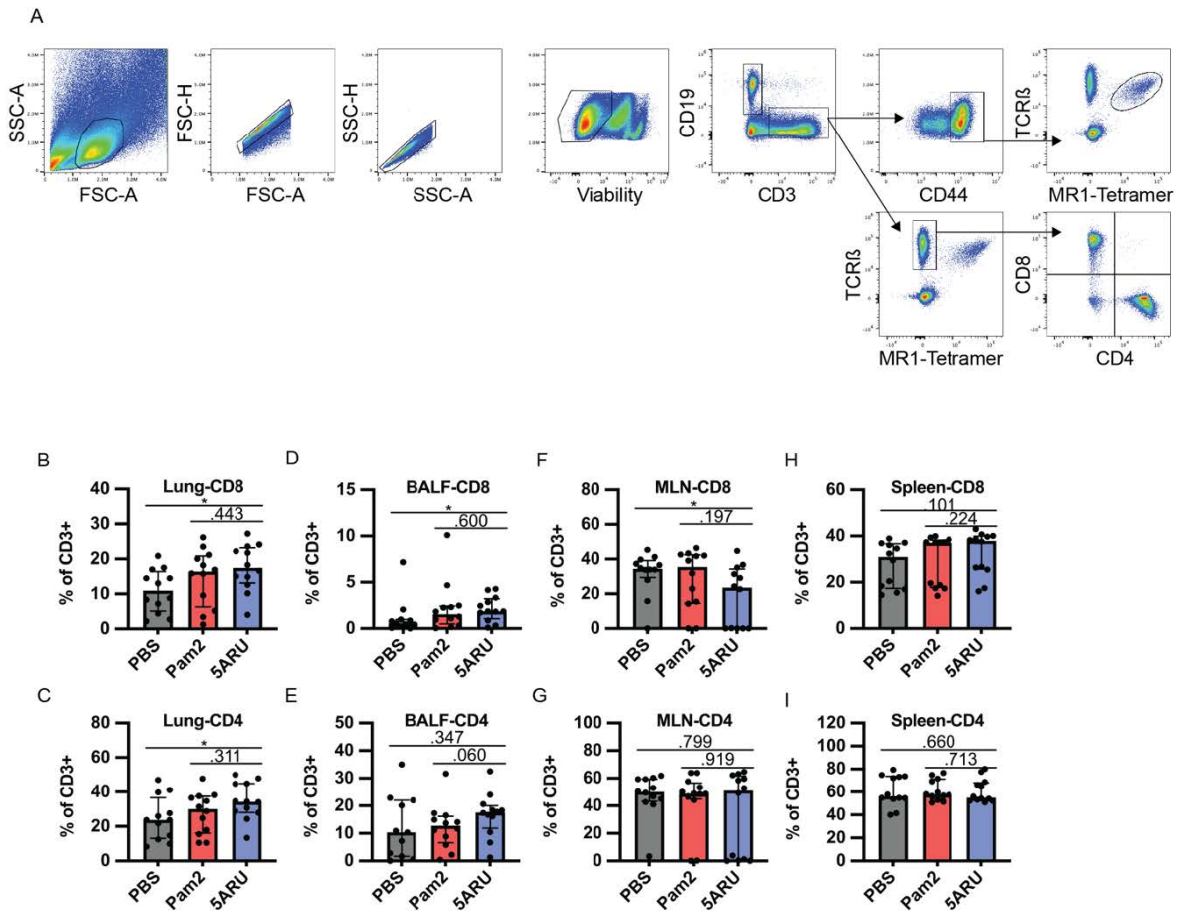

**Supplementary Figure 1. No changes in non-MAIT T cell populations in live *V. cholerae* vaccination following 5-A-RU treatment.** (A) Representative flow cytometry gating strategy for MAIT and non-MAIT T cells in mouse lungs vaccinated with live *V. cholerae*. (B-I) Frequency of CD8 and CD4 T cells as a percentage of total CD3+ cells in Lung (B-C), BALF (D-E), MLN (F-G), and spleen (H-I). Data are represented as Median with IQR from 3 independent experiments. n=11-12 mice per group. \* $P < 0.05$ , \*\* $P > 0.01$ , \*\*\* $P > 0.001$ , \*\*\*\* $P > 0.0001$  by 2-tailed Mann-Whitney  $U$  test.

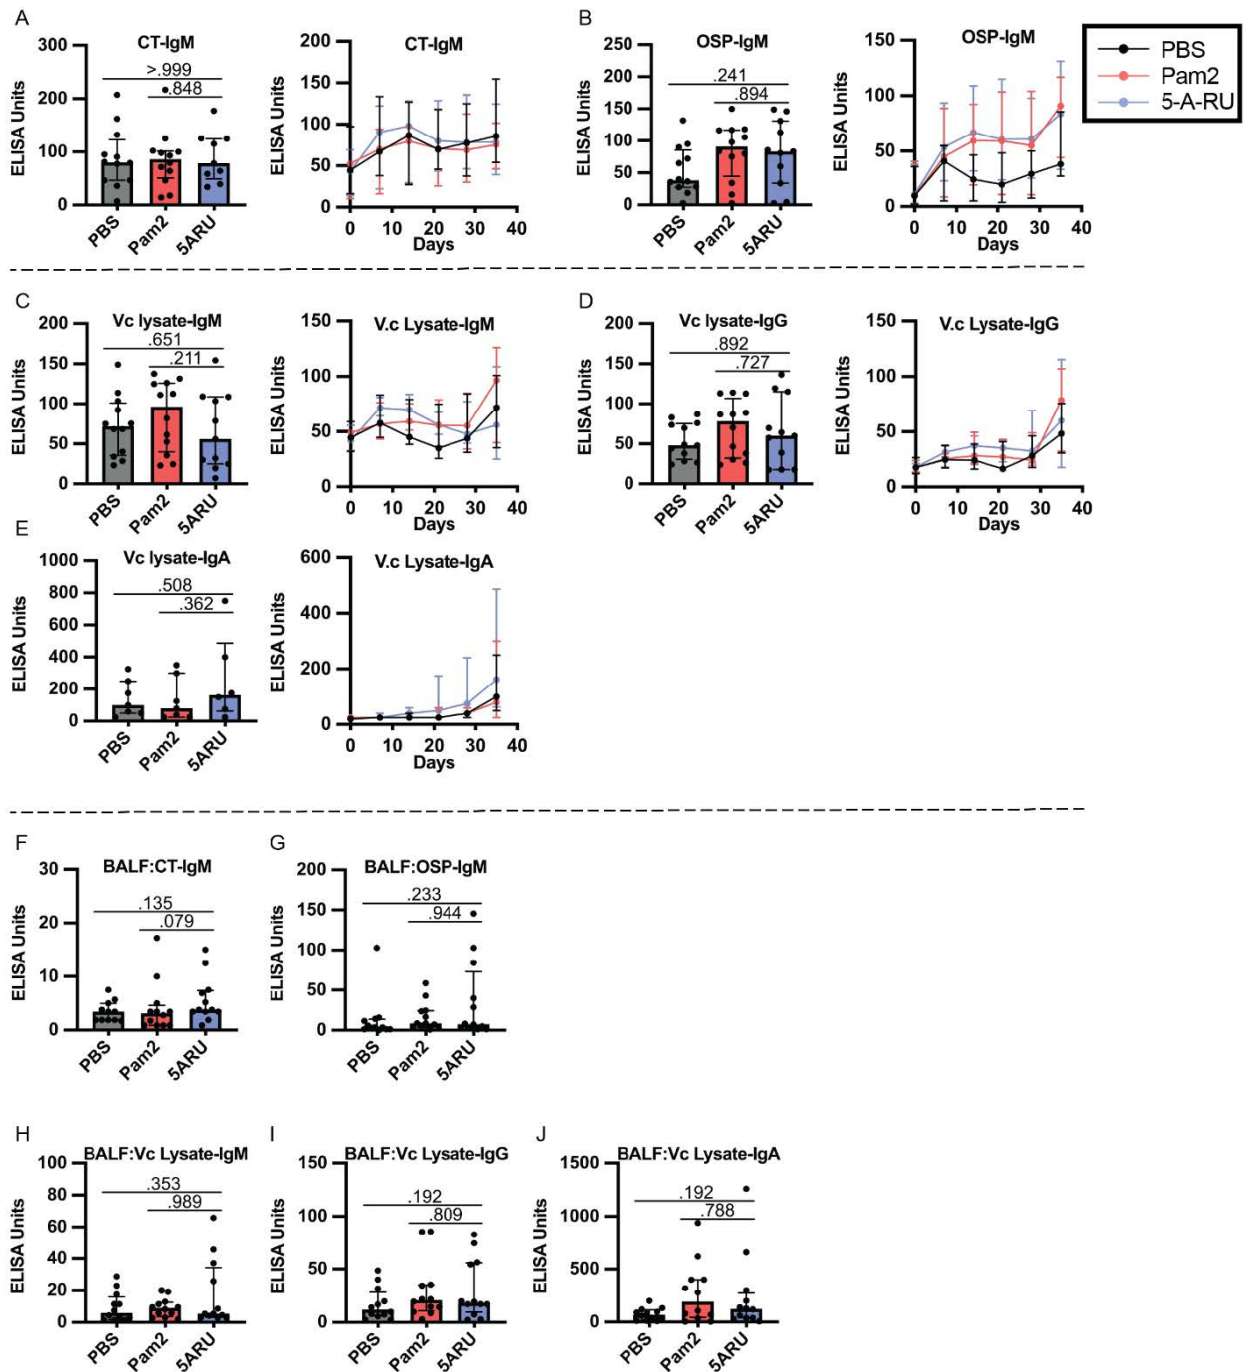

**Supplementary Figure 2. Intranasal 5-A-RU has no effect on *V. cholerae*-specific antibody responses when administered with a live *V. cholerae* vaccination.** Serum day 35 endpoint (left) and time-course (right) (A) CTIgM, (B) OSP-IgM, (C) *V. cholerae*-lysate-IgM, (D) *V. cholerae*-lysate-IgG, (E) *V. cholerae*-lysate-IgA ELISAs. (F-J) BAL fluid day 35 endpoint (F) CT-IgM, (G) OSP-IgM, (H) *V. cholerae*-lysate-IgM, (I) *V. cholerae*-lysate-IgG, and (J) *V. cholerae*-lysate-IgA ELISAs. Data are represented as ELISA units measured kinetically and normalized to positive control pooled serum from WT B6 mice intranasally vaccinated with live *V. cholerae*. Data are represented as Median with IQR from 3 independent experiments. n=11-12 mice per group. *P* values determined by 2-tailed Mann-Whitney *U* test.

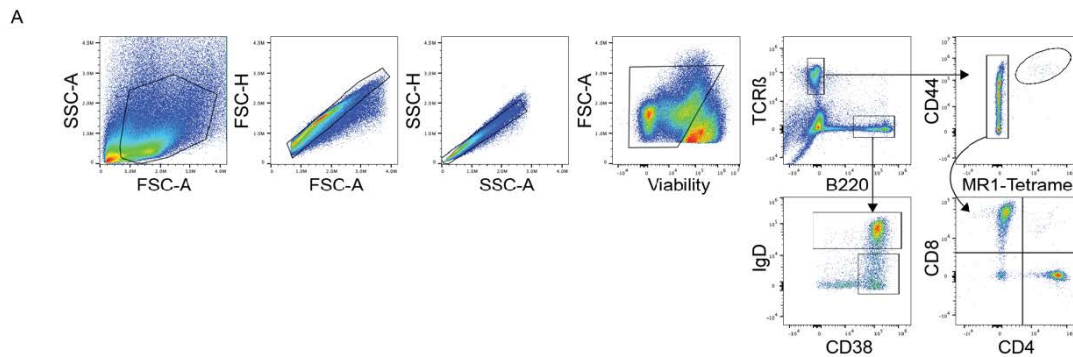

**Supplementary Figure 3. Flow gating of T and B cell populations from intranasal *V. cholerae* OSP vaccination.** (A) Representative flow cytometry gating strategy for MAIT cells, non-MAIT T cells and B cells in mouse lungs vaccinated with *V. cholerae* O1 Ogawa OSP:BSA.

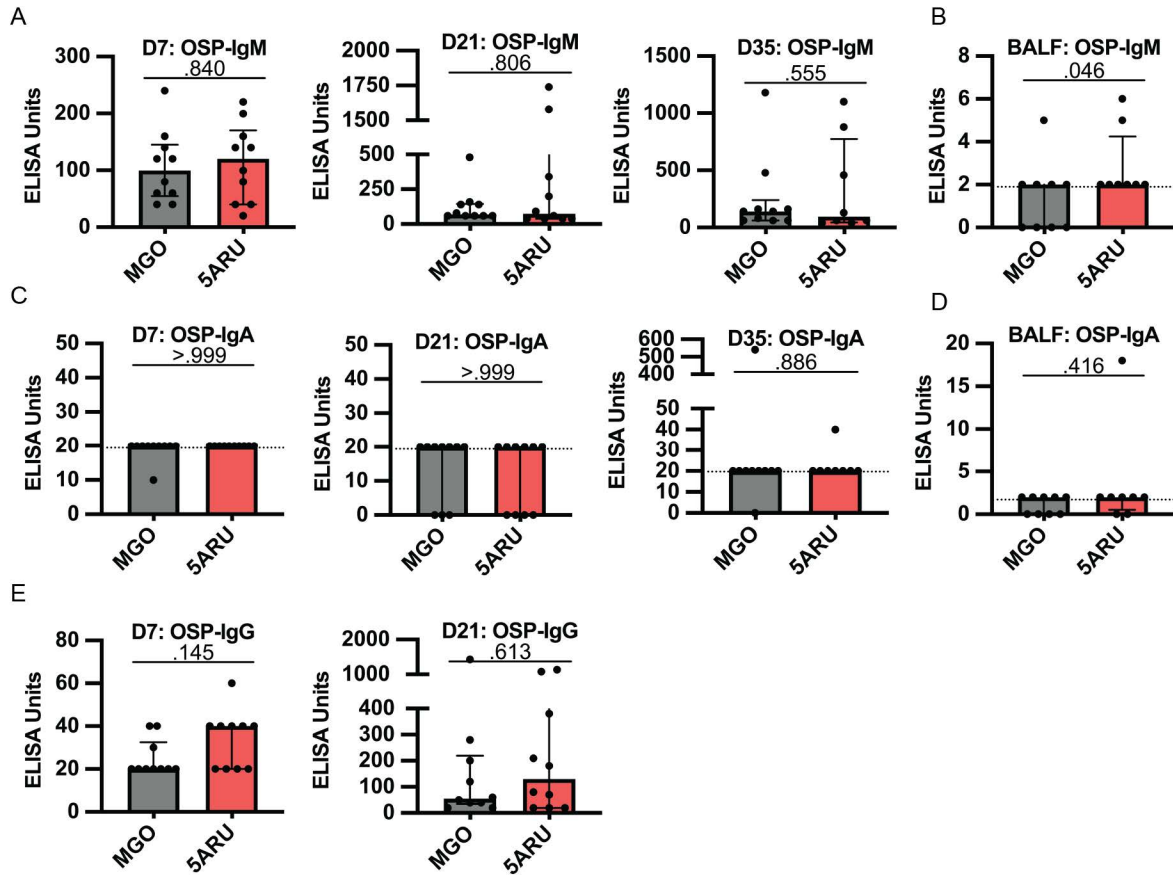

**Supplementary Figure 4. Intranasal 5-A-RU has no effect on mucosal or systemic polysaccharide-specific IgM and IgA antibody responses.** (A) Serum day 7 (left), day 21 (middle) and day 35 (right), and (B) BALF day 35 endpoint OSP-IgM ELISAs. (C) Serum day 7 (left), day 21 (middle) and day 35 (right), and (D) BALF day 35 endpoint OSP-IgA ELISAs. (E) Serum day 7 (left) and day 21 (right) OSP-IgG ELISAs. Data are represented as ELISA units measured kinetically and normalized to positive control pooled serum from WT B6 mice intranasally vaccinated with live *V. cholerae*. P values determined by 2-tailed Mann-Whitney *U* test. Dotted lines indicate Limit of Detection (LOD).

| ELISA (Sample Tissue:Target) | MAIT Frequency (Tissue) | R squared | P Value |
|------------------------------|-------------------------|-----------|---------|
| BALF:OSP-IgG                 | BALF                    | 0.536     | 0.0389  |
| BALF:OSP-IgG                 | Lung                    | 0.1564    | 0.4377  |
| Serum:OSP-IgG                | BALF                    | 0.2851    | 0.1728  |
| Serum:OSP-IgG                | Lung                    | 0.01737   | 0.8327  |
| Serum:OSP-IgM                | BALF                    | 0.03489   | 0.2169  |
| Serum:OSP-IgM                | Lung                    | 0.7369    | 0.0287  |

**Supplementary Table 1. OSP ELISA vs MAIT frequency.** Simple linear regression analysis associating BALF and serum OSP:BSA IgG and IgA ELISA data and MAIT frequency from BALF and lungs in mice treated with *V. cholerae* OSP:BSA and 5-A-RU (Figures 4 and 5). BALF OSP-IgM ELISA data was omitted from analysis as few samples were above the LOD.
